# Supplementary material for: Design of robust 2,2′-bipyridine ligand linkers for the stable immobilization of molecular catalysts on silicon(111) surfaces
Source: Royal Society of Chemistry journal article supplement (doi:10.1039/d1cp00545f), 2021-01-01
Supplement: d1cp00545f1.pdf [file d1cp00545f1.pdf]

Supporting Information for “Design of robust 2,2′-bipyridine ligand linkers for the stable  
immobilization of molecular catalysts on silicon(111) surfaces”

Samantha I. Johnson, James D. Blakemore, Bruce S. Brunshwig, Nathan S. Lewis, Harry B.  
Gray, William A. Goddard III\*, Petter Persson\*

Geometries

1

## Geometries

Cartesian coordinates for molecules calculated in this manuscript can be found in the accompanying XYZ file. These can be opened with any computational chemistry graphical viewer, for example Mercury, which can be obtained free of charge at [www.ccdc.cam.ac.uk](http://www.ccdc.cam.ac.uk).
